# Supplementary material for: Structure and photoluminescence of Mn2+/4+-activated doubly ordered spinel Mg4(Ga/Al)SbO8: site-selective Al3+-to-Ga3+ substitution enabling Mn4+ accumulation, excellent anti-thermal quenching of Mn2+ green emission, and optical thermometry
Source: Royal Society of Chemistry journal article supplement (doi:10.1039/d3qi02618c), 2024-01-01
Supplement: d3qi02618c1.pdf [file d3qi02618c1.pdf]

---

Supporting information for

**Structure and photoluminescence of Mn<sup>2+/4+</sup>-activated doubly ordered spinel Mg<sub>4</sub>(Ga/Al)SbO<sub>8</sub>: site-selective Al<sup>3+</sup>-to-Ga<sup>3+</sup> substitution enabling Mn<sup>4+</sup> accumulation, excellent anti-thermal quenching of Mn<sup>2+</sup> green-emission, and optical thermometry**

Zien Cheng,<sup>a,#</sup> Guangxiang Lu,<sup>a,#</sup> Yuxuan Qi,<sup>b</sup> Jinmei Huang,<sup>a</sup> Gonggui Yan,<sup>a</sup> Leiming Fang,<sup>c</sup> Maxim Avdeev,<sup>\*d,e</sup> Tao Yang<sup>\*a</sup> and Pengfei Jiang,<sup>\*a</sup>

<sup>a</sup>College of Chemistry and Chemical Engineering, Chongqing University, Chongqing 401331, China

<sup>b</sup>Chongqing Academy of Metrology & Quality Inspection, Chongqing 401121, China

<sup>c</sup>Key Laboratory for Neutron Physics, Institute of Nuclear Physics and Chemistry, China Academy of Engineering Physics, Mianyang 621999, China

<sup>d</sup>Australian Nuclear Science and Technology Organisation, Lucas Heights, NSW 2234, Australia

<sup>e</sup>School of Chemistry, The University of Sydney, Sydney, NSW 2006, Australia

\*Corresponding Authors: max@ansto.gov.au; taoyang@cqu.edu.cn; pengfeijiang@cqu.edu.cn.

#These authors contributed equally.

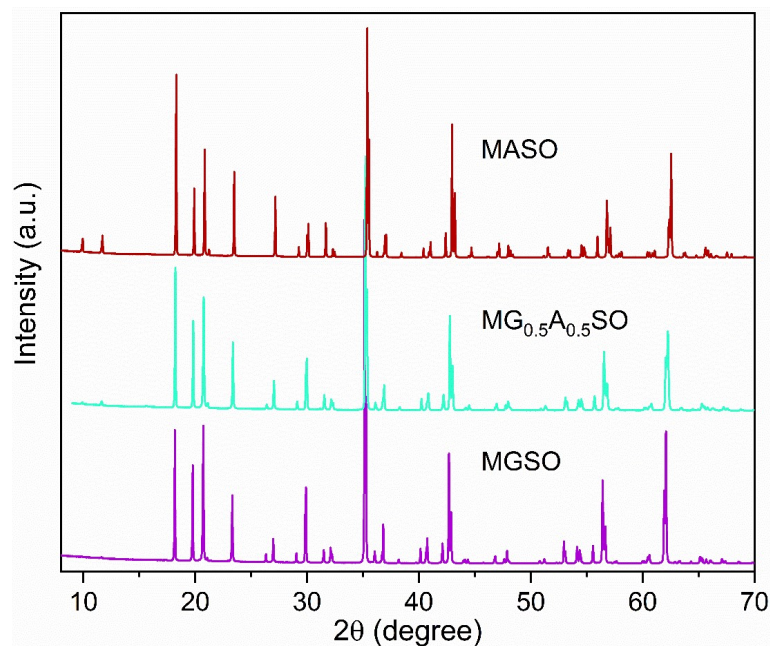

**Fig. S1** XRD patterns for MGSO,  $MG_{0.5}A_{0.5}O$ , MASO.

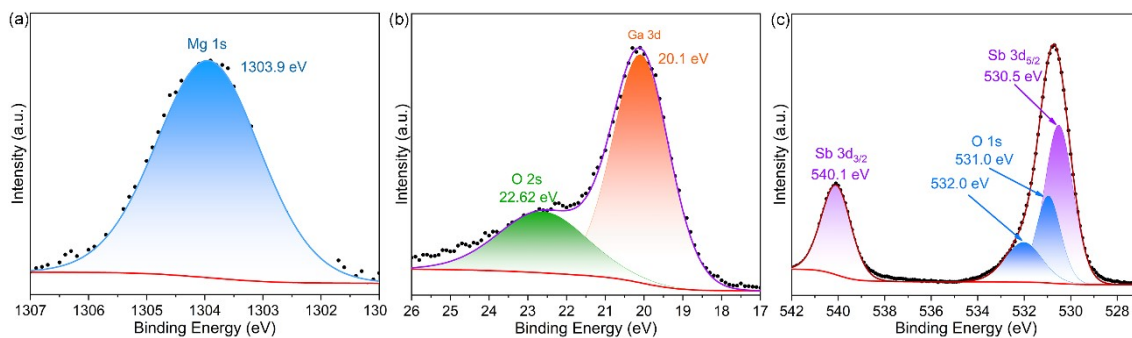

**Fig. S2** High-resolution XPS spectra for Mg 1s (a), Ga 3d (b), and O 1s and Sb 3d (c).

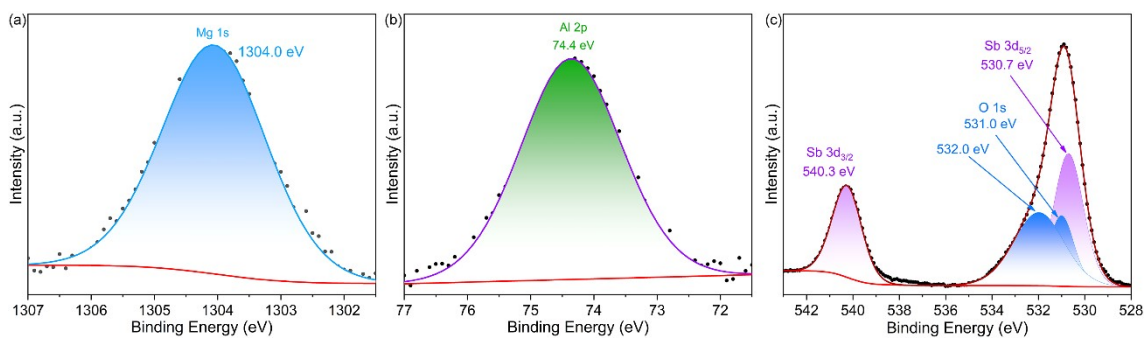

**Fig. S3** High-resolution XPS spectra for Mg 1s (a), Al 3d (b), and O 1s and Sb 3d (c).

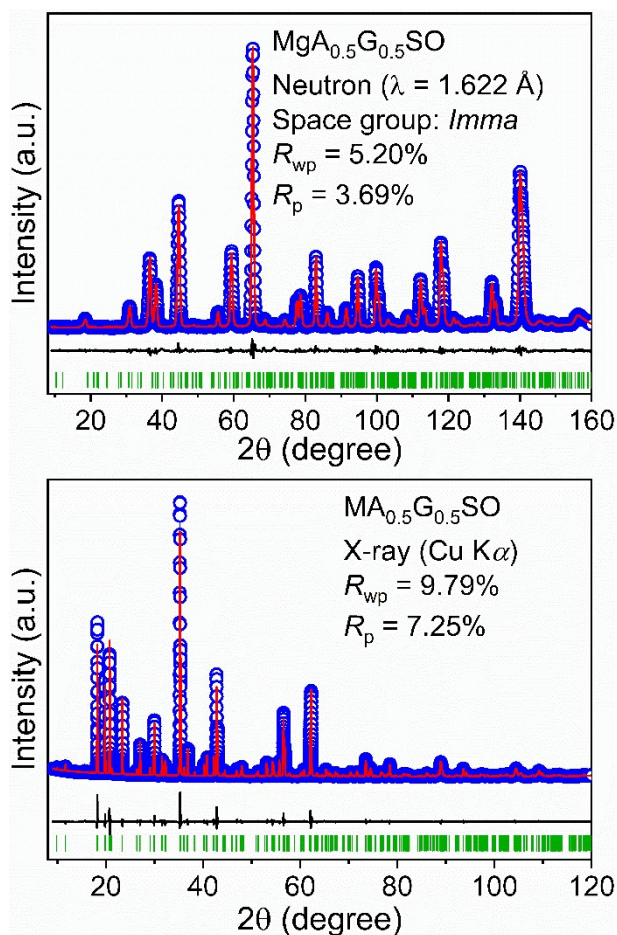

**Fig. S4** Rietveld refinement plots of NPD and PXRD data for  $MgA_{0.5}G_{0.5}SO$ . The circles, red and black solid lines represent the observed data, calculated data, and their differences. The expected Bragg positions are given as green bars at the bottom of the patterns.

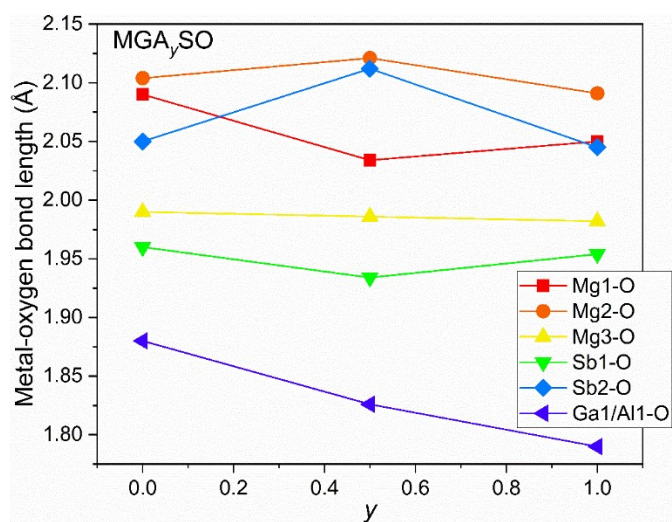

**Fig. S5** Plots of metal–oxygen bond length as a function of Al-content in  $MGA_yO$  ( $y = 0, 0.5, 1$ ).

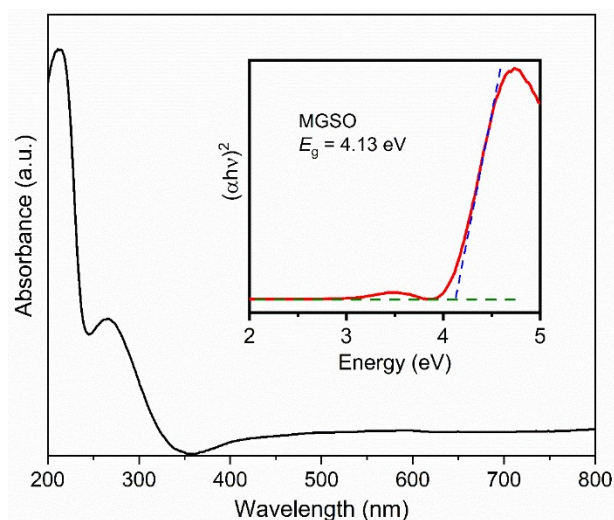

**Fig. S6** UV-vis diffusion spectra for MGSO. The insets show the plots of  $(\alpha h\nu)^2$  as a function of the photon energy.

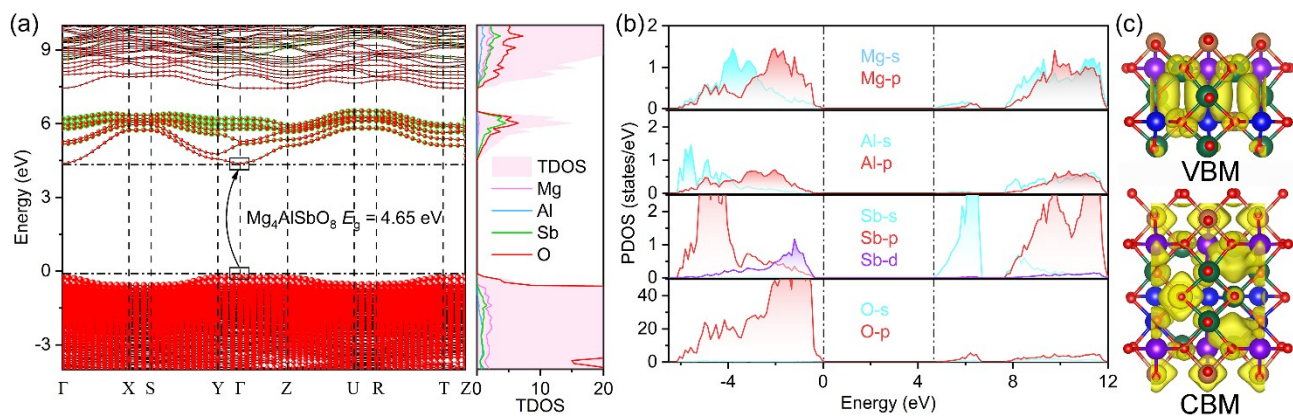

**Fig. S7** (a) Electronic band structure of MASO. (b) PDOS of Mg, Al, Sb, and O for MGSO. (c) Isosurfaces ( $5 \times 10^{-4} e^-/\text{bohr}^3$ ) of the partial charge density at the VBM and CBM of MASO.

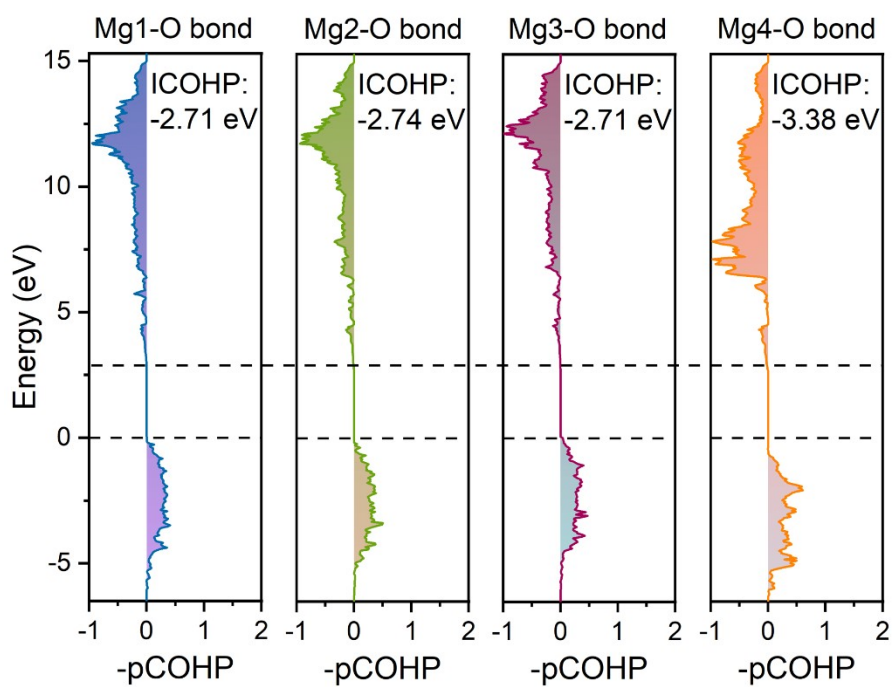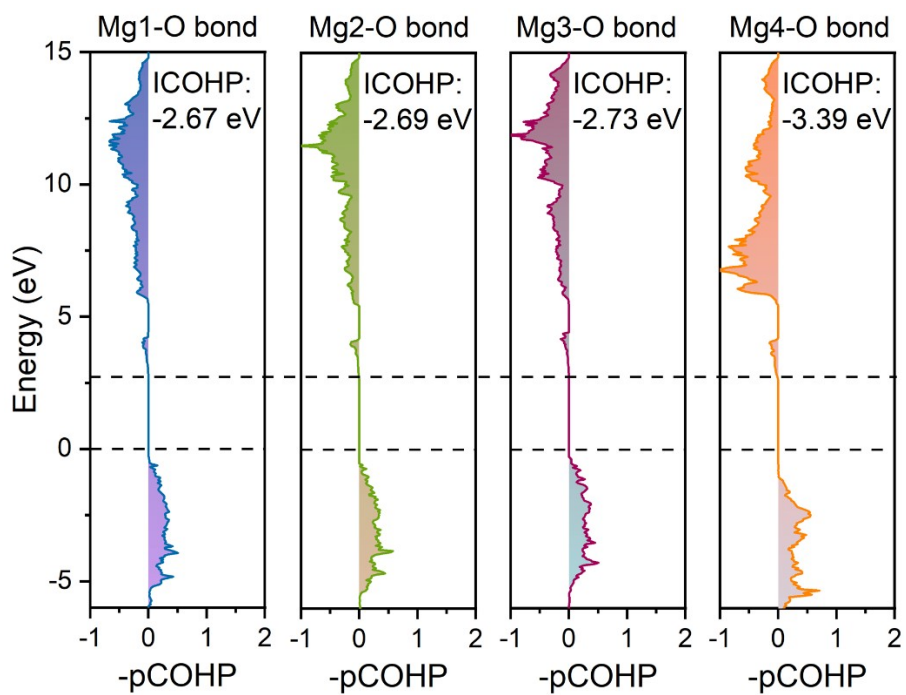

**Fig. S8** COHP diagrams of the Mg–O bonds in MGSO and MASO.

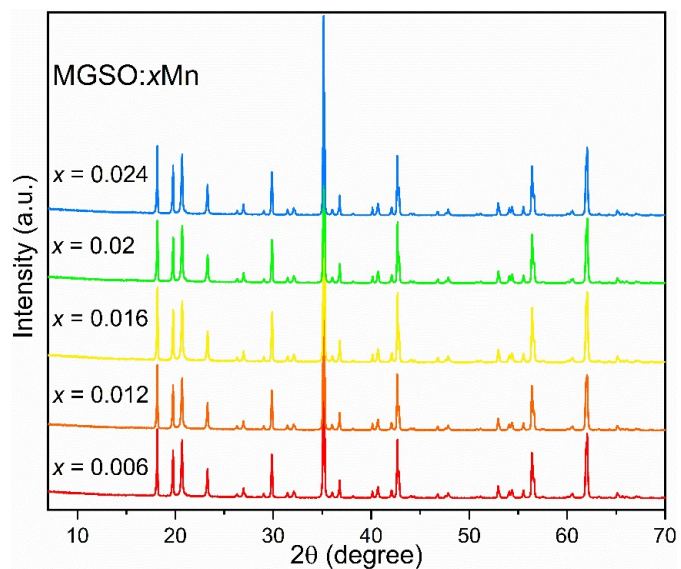

Fig. S9 XRPD patterns for MGSO:xMn.

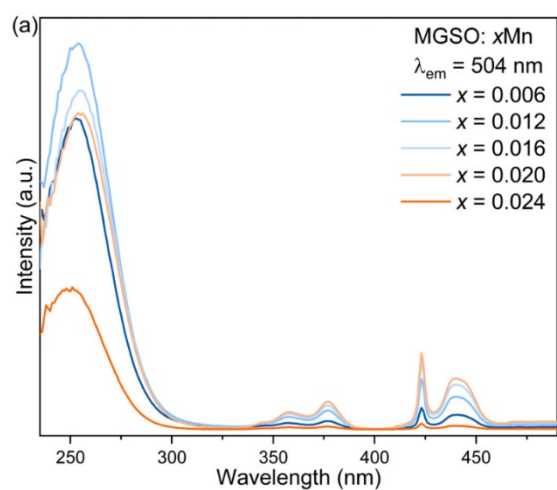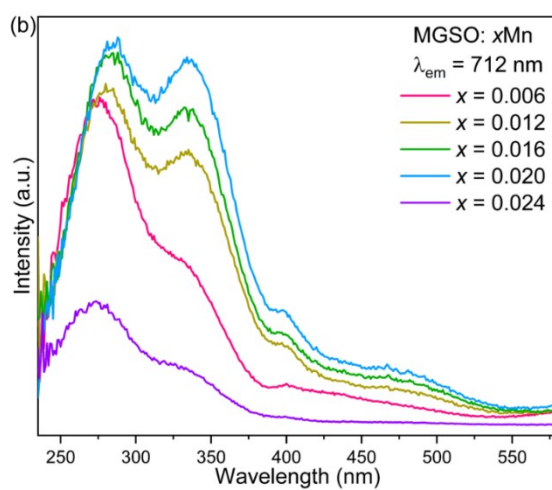

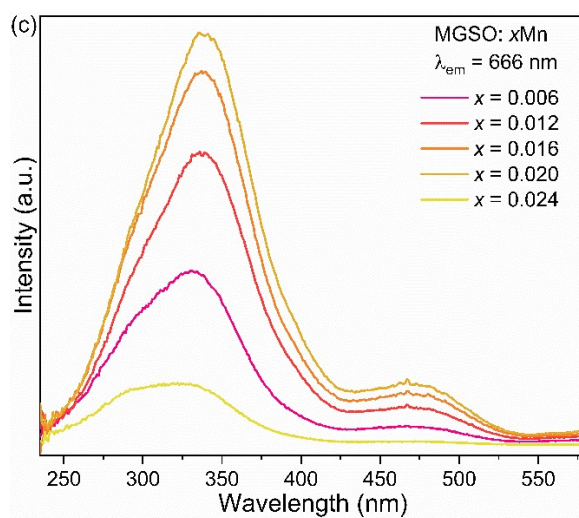

**Figure S10.** PLE spectra of MISO: $x$ Mn monitored at wavelengths of 504 nm (a), 712 (b) and 666 nm (c).

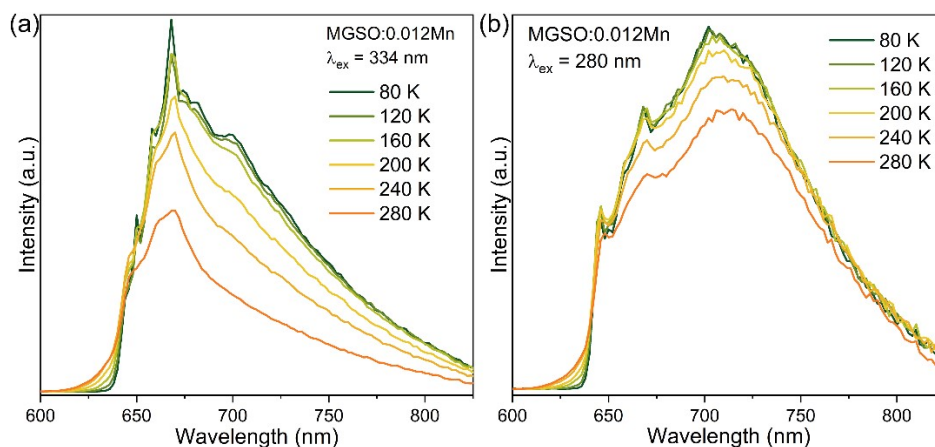

**Fig. S11** Low-temperature PL spectra for MGSO:0.012Mn recorded under excitation wavelengths of 334 (a) and 280 nm (b).

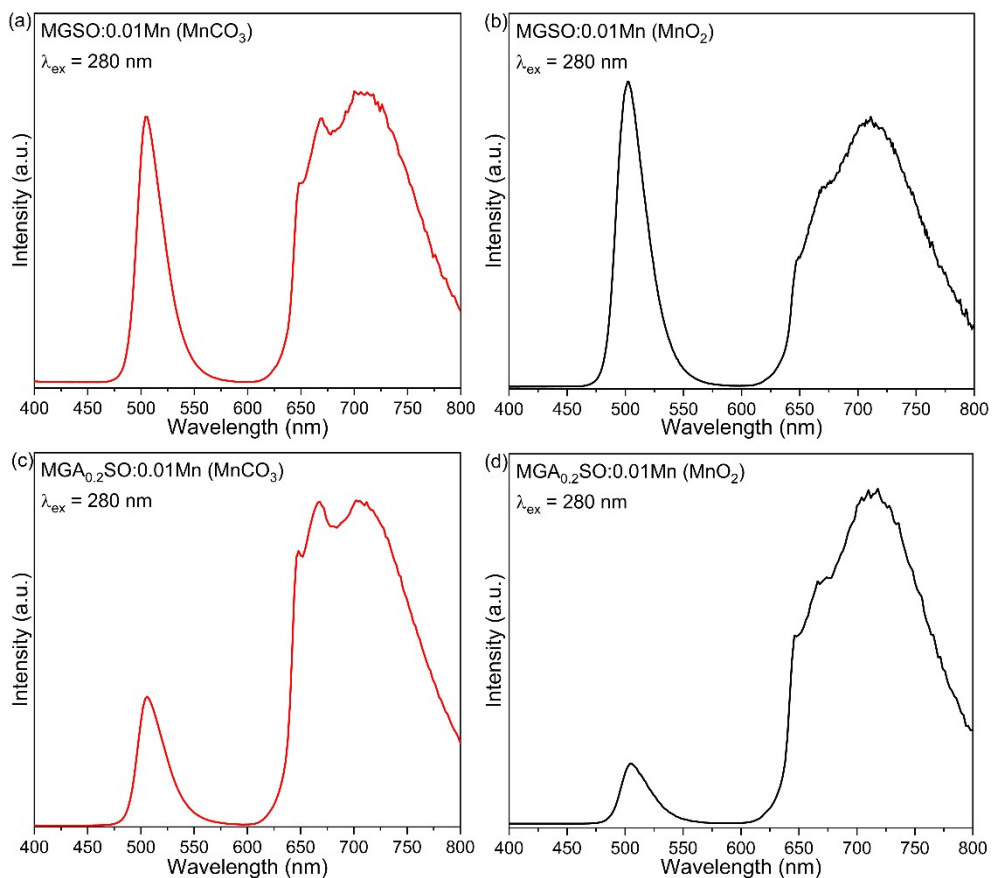

**Fig. S12** Spectroscopic comparison for  $\text{MGA}_y\text{SO:0.01Mn}$  ( $y = 0$  and  $0.2$ ) prepared with different Mn-sources.

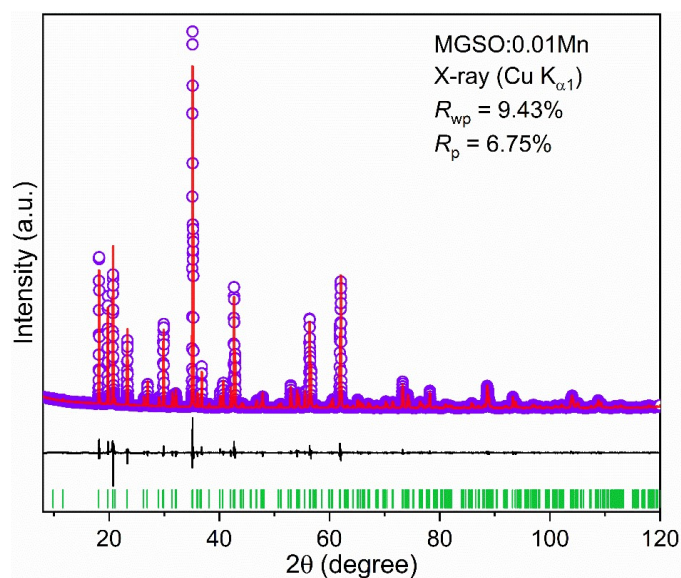



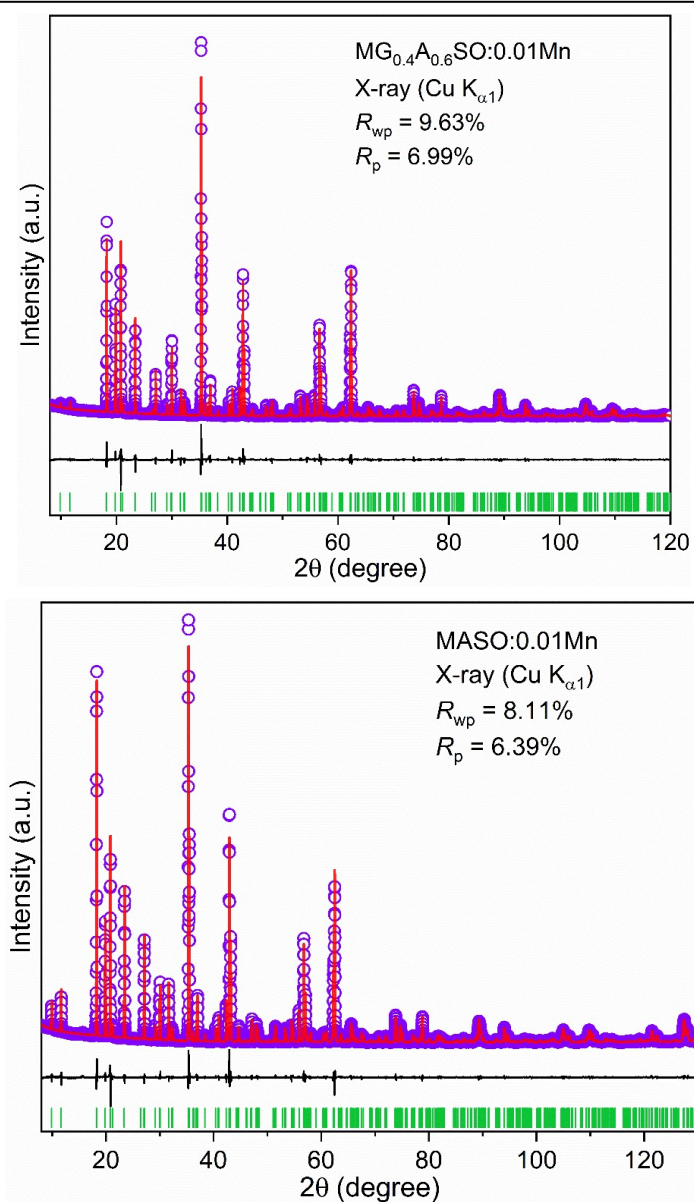

**Fig. S13** Rietveld plots of XRPD data for MGA<sub>y</sub>SO:0.01Mn with  $y = 0, 0.6,$  and  $1.$

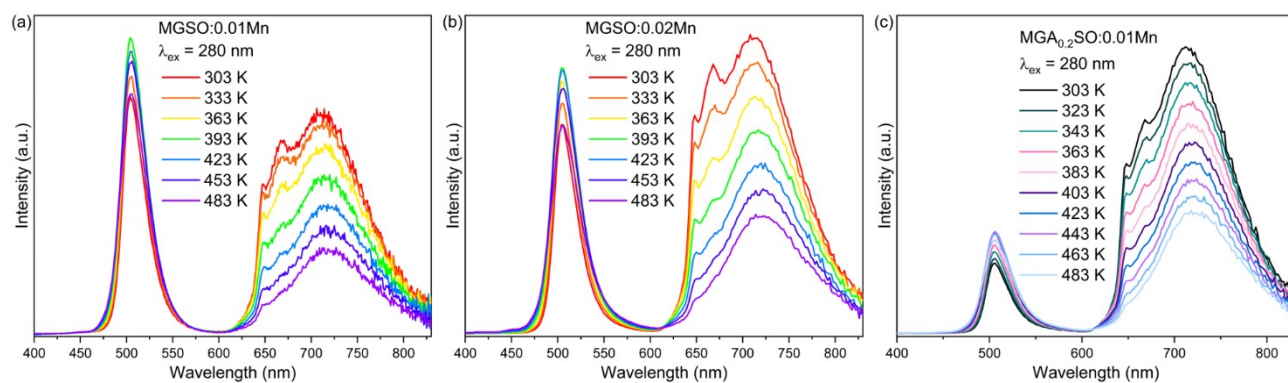

**Fig. S14** Temperature-dependent PL spectra for MGSO:0.01Mn (a), MGSO:0.02Mn (b), and MGA0.2SO:0.01Mn (c) under an excitation wavelength of 280 nm.

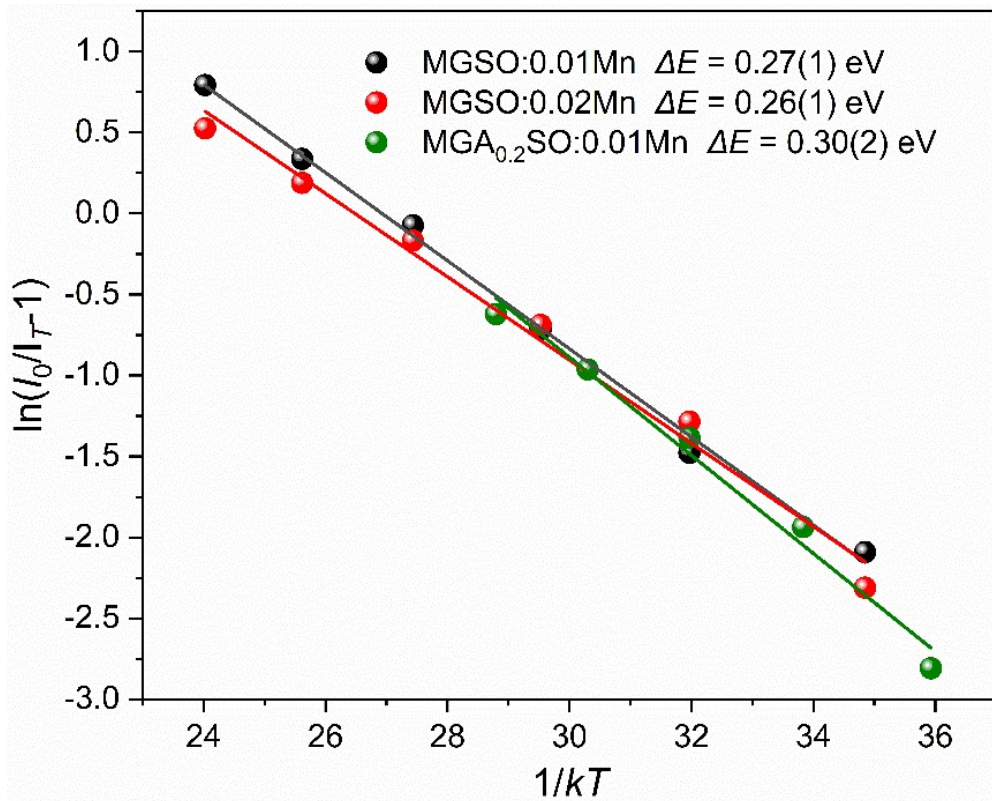

**Fig. S15** Linear fitting of the  $\ln(I_0/I_T - 1) - 1/kT$  curves for MGSO: $x$ Mn ( $x = 0.01$  and  $0.02$ ) and MGA<sub>0.2</sub>SO:0.01Mn.

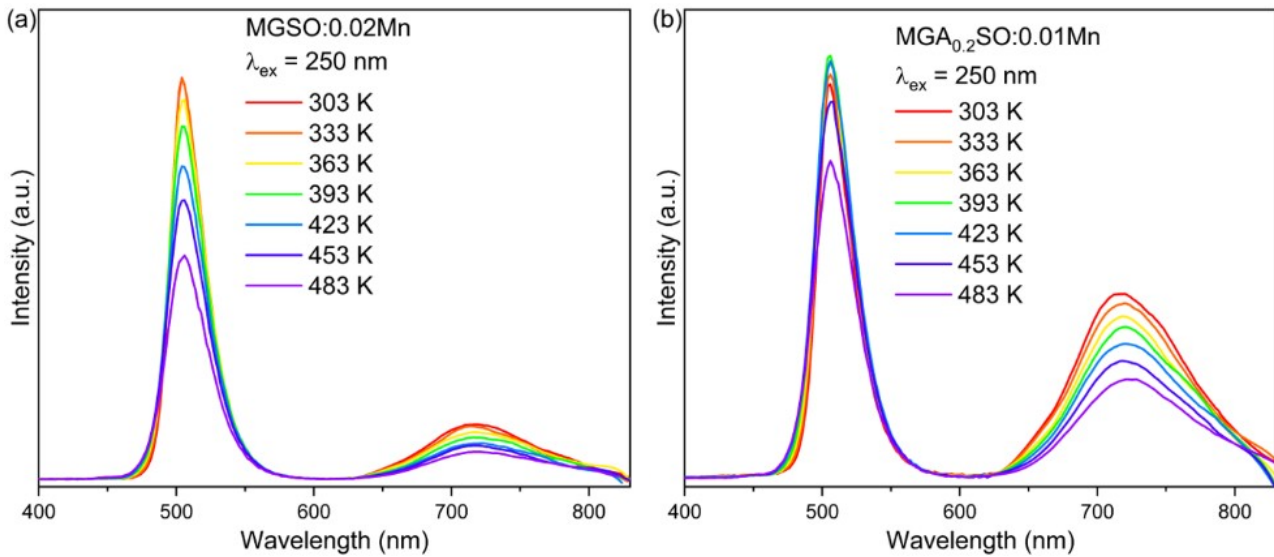

**Fig. S16** Temperature-dependent PL spectra for MGSO:0.02Mn (a), MGA<sub>0.2</sub>SO:0.01Mn (b), and MGA<sub>0.4</sub>SO:0.01Mn under an excitation wavelength of 250 nm.

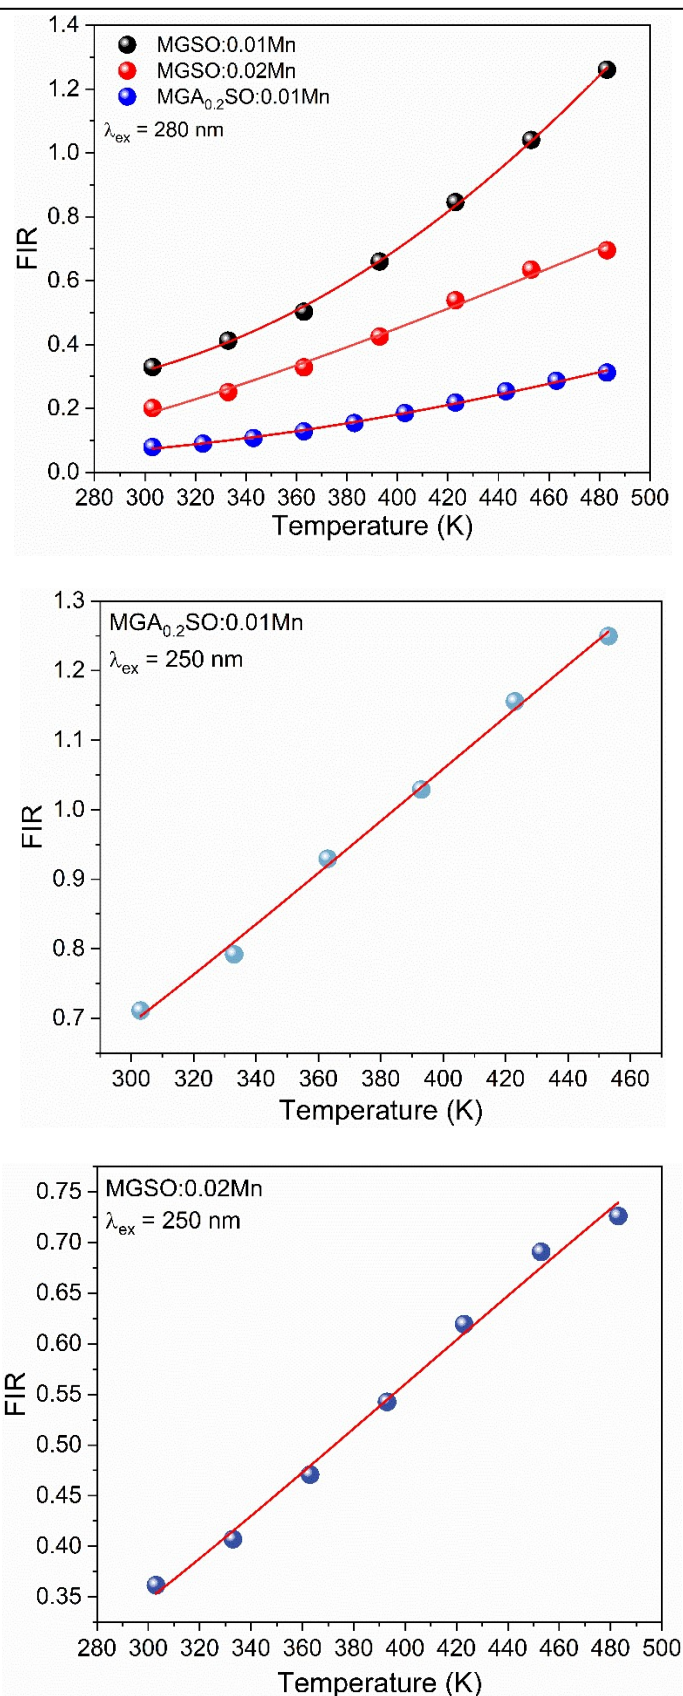

**Fig. S17** Fitting of the FIR–T curves for MGSO:*x*Mn (*x* = 0.01 and 0.02) and MGA<sub>0.2</sub>SO:0.01Mn.

**Table S1.** Crystallographic data for  $\text{MG}_{0.5}\text{A}_{0.5}\text{SO}$ .

| formula                            | $\text{Mg}_4\text{Ga}_{0.5}\text{Al}_{0.5}\text{SbO}_8$ |         |
|------------------------------------|---------------------------------------------------------|---------|
| source                             | X-ray (Cu $K\alpha_1$ )                                 | neutron |
| temperature                        | 298                                                     |         |
| wavelength ( $\text{\AA}$ )        | 1.5406                                                  | 1.6220  |
| space group (no.)                  | <i>Imma</i> (no. 74)                                    |         |
| <i>a</i> ( $\text{\AA}$ )          | 5.98102(5)                                              |         |
| <i>b</i> ( $\text{\AA}$ )          | 17.933(3)                                               |         |
| <i>c</i> ( $\text{\AA}$ )          | 8.41505(6)                                              |         |
| <i>V</i> ( $\text{\AA}^3$ )        | 902.66(1)                                               |         |
| <i>Z</i>                           | 6                                                       |         |
| <i>d</i> -spacing ( $\text{\AA}$ ) | 0.82–10                                                 | 0.81–10 |
| $R_{\text{wp}}$ (%)                | 9.79                                                    | 5.20    |
| $R_{\text{p}}$ (%)                 | 7.25                                                    | 3.69    |
| $R_{\text{exp}}$ (%)               | 2.21                                                    | 2.61    |
| gof                                | 4.43                                                    | 1.99    |

**Table S2.** Atomic coordinates, site occupation factors, isotropic thermal displacement factors, of  $\text{MG}_{0.5}\text{A}_{0.5}\text{SO}$  and MASO obtained from combined Rietveld refinements against both X-ray and neutron diffraction data.

| <b><math>\text{MG}_{0.5}\text{A}_{0.5}\text{SO}</math></b> |      |          |           |           |                 |                                      |
|------------------------------------------------------------|------|----------|-----------|-----------|-----------------|--------------------------------------|
| atom                                                       | site | <i>x</i> | <i>y</i>  | <i>z</i>  | <i>sof.</i>     | $B_{\text{iso.}}$ ( $\text{\AA}^2$ ) |
| Mg1/Al                                                     | 8h   | 0        | 0.1691(1) | 0.0006(3) | 0.96(5)/0.04(5) | 0.22(3)                              |

|        |     |           |           |           |                   |         |
|--------|-----|-----------|-----------|-----------|-------------------|---------|
| Mg2/Al | 8g  | 0.25      | 0.0095(7) | 0.25      | 0.82(5)/0.18(5)   | 0.28(5) |
| Sb1    | 4b  | 0         | 0         | 0         | 1                 | 1.5(2)  |
| Sb2/Mg | 4c  | 0.25      | 0.25      | 0.75      | 0.5/0.5           | 0.49(2) |
| Ga1/Al | 4e  | 0         | 0.25      | 0.375 (2) | 0.695(3)/0.305(3) | 1.1(1)  |
| Mg3/Ga | 8h  | 0         | 0.0834(1) | 0.6290(5) | 0.973(2)/0.027(2) | 0.62(4) |
| O1     | 8i  | 0.239(2)  | 0.25      | 0.511(2)  | 1                 | 1.1(2)  |
| O2     | 8h  | 0         | 0.1726(2) | 0.2500(6) | 1                 | 0.4(1)  |
| O3     | 8h  | 0         | 0.6663(4) | 0.2640(7) | 1                 | 0.7(2)  |
| O4     | 8h  | 0         | 0         | 0.2702(6) | 1                 | 0.7(2)  |
| O5     | 16j | 0.7889(5) | 0.5816(1) | 0.4915(6) | 1                 | 0.4(1)  |

### MASO

| atom   | site | <i>x</i>  | <i>y</i>   | <i>z</i>  | <i>sof.</i> | B <sub>iso.</sub> (Å <sup>2</sup> ) |
|--------|------|-----------|------------|-----------|-------------|-------------------------------------|
| Mg1    | 8h   | 0         | 0.16983(6) | 0.0097(2) | 1           | 0.28(3)                             |
| Mg2/Al | 8g   | 0.25      | 0.09055(7) | 0.25      | 0.75/0.25   | 0.58(3)                             |
| Sb1    | 4b   | 0         | 0          | 0         | 1           | 0.246(7)                            |
| Sb2/Mg | 4c   | 0.25      | 0.25       | 0.75      | 0.5/0.5     | 0.57(1)                             |
| Al1    | 4e   | 0         | 0.25       | 0.3756(3) | 1           | 0.44(3)                             |
| Mg3    | 8h   | 0         | 0.08341(8) | 0.627(2)  | 1           | 0.35(2)                             |
| O1     | 8i   | 0.2534(8) | 0.25       | 0.504(1)  | 1           | 1.1(1)                              |
| O2     | 8h   | 0         | 0.1670(4)  | 0.2576(8) | 1           | 0.9(1)                              |
| O3     | 8h   | 0         | 0.6735(3)  | 0.2613(7) | 1           | 0.42(8)                             |
| O4     | 8h   | 0         | 0          | 0.2370(8) | 1           | 0.57(8)                             |

|    |     |           |           |           |   |         |
|----|-----|-----------|-----------|-----------|---|---------|
| O5 | 16j | 0.7806(4) | 0.5796(2) | 0.4902(6) | 1 | 0.37(5) |
|----|-----|-----------|-----------|-----------|---|---------|

**Table S3.** Selected interatomic distances for MGSO,  $MG_{0.5}A_{0.5}SO$  and MASO.

| <b>MGSO</b>                           |          |               |          |               |          |
|---------------------------------------|----------|---------------|----------|---------------|----------|
| Mg1/Ga—O1 × 2                         | 2.04(1)  | Mg2/Ga—O2 × 2 | 2.06(1)  | Mg3/Ga—O4     | 1.82(2)  |
| Mg1/Ga—O3                             | 2.06(3)  | Mg2/Ga—O5 × 2 | 2.063(9) | Mg3/Ga—O3     | 2.02(2)  |
| Mg1/Ga—O2                             | 2.09(2)  | Mg2/Ga—O4 × 2 | 2.189(9) | Mg3/Ga—O5 × 2 | 2.05(1)  |
| Mg1/Ga—O5 × 2                         | 2.09(1)  | <Mg2/Ga—O>    | 2.104(9) | <Mg3/Ga—O>    | 1.99(2)  |
| < Mg1/Ga—O>                           | 2.07(2)  |               |          |               |          |
| Sb1—O4 × 2                            | 1.96(2)  | Sb2/Mg—O3 × 4 | 2.04(1)  | Ga1/Mg—O2 × 2 | 1.80(1)  |
| Sb1—O5 × 4                            | 1.958(9) | Sb1/Mg—O1 × 2 | 2.07(2)  | Ga1/Mg—O1 × 2 | 1.95(2)  |
| <Sb1—O>                               | 1.96(2)  | <Sb1/Mg—O>    | 2.05(1)  | <Ga1/Mg—O>    | 1.88(2)  |
| <b><math>MG_{0.5}A_{0.5}SO</math></b> |          |               |          |               |          |
| Mg1/Al—O1 × 2                         | 2.020(3) | Mg2/Al—O2 × 2 | 2.109(4) | Mg3—O4        | 1.910(4) |
| Mg1/Al—O3                             | 2.042(7) | Mg2/Al—O5 × 2 | 2.051(5) | Mg3—O3        | 1.872(7) |
| Mg1/Al—O2                             | 2.091(6) | Mg2/Al—O4 × 2 | 2.203(2) | Mg3—O5 × 2    | 2.080(4) |
| Mg1/Al—O5 × 2                         | 2.015(3) | <Mg2/Al—O>    | 2.121(4) | <Mg3—O>       | 1.986(4) |
| < Mg1/Al—O>                           | 2.034(4) |               |          |               |          |
| Sb1—O4 × 2                            | 1.934(5) | Sb2/Mg—O3 × 4 | 2.122(4) | Ga1/Al—O2 × 2 | 1.740(5) |
| Sb1—O5 × 4                            | 1.934(3) | Sb1/Mg—O1 × 2 | 2.093(4) | Ga1/Al—O1 × 2 | 1.911(5) |
| <Sb1—O>                               | 1.934(4) | <Sb1/Mg—O>    | 2.112(4) | <Ga1/Mg—O>    | 1.826(5) |
| <b>MASO</b>                           |          |               |          |               |          |
| Mg1—O1 × 2                            | 2.062(2) | Mg2/Al—O2 × 2 | 2.060(2) | Mg3—O4        | 1.894(2) |

|            |          |               |          |            |          |
|------------|----------|---------------|----------|------------|----------|
| Mg1—O3     | 2.066(4) | Mg2/Al—O5 × 2 | 2.009(3) | Mg3—O3     | 1.954(4) |
| Mg1—O2     | 2.091(4) | Mg2/Al—O4 × 2 | 2.203(1) | Mg3—O5 × 2 | 2.039(2) |
| Mg1—O5 × 2 | 2.050(2) | <Mg2/Al—O>    | 2.091(2) | <Mg3—O>    | 1.982(3) |
| <Mg1—O>    | 2.064(3) |               |          |            |          |
| Sb1—O4 × 2 | 1.959(3) | Sb2/Mg—O3 × 4 | 2.041(2) | Al1—O2 × 2 | 1.728(3) |
| Sb1—O5 × 4 | 1.952(2) | Sb1/Mg—O1 × 2 | 2.053(4) | Al1—O1 × 2 | 1.851(3) |
| <Sb1—O>    | 1.954(2) | <Sb1/Mg—O>    | 2.045(3) | <Ga1/Mg—O> | 1.790(3) |

**Table S4.** Lattice parameters of the structures after DFT optimization.

| Compounds   | $a$ (Å) | $b$ (Å) | $c$ (Å) | $V$ (Å <sup>3</sup> ) |
|-------------|---------|---------|---------|-----------------------|
| <b>MGSO</b> | 6.07    | 18.23   | 8.55    | 947.14                |
| <b>MASO</b> | 6.03    | 18.06   | 8.46    | 921.77                |

**Table S5.** Fitted values of  $\tau_1$ ,  $\tau_2$ ,  $A_1$ , and  $A_2$  for the decay curves of MGSO: $x$ Mn phosphors.

| $\lambda_{\text{ex}} = 252 \text{ nm}, \lambda_{\text{em}} = 504 \text{ nm}$ |                                 |                                 |         |         |
|------------------------------------------------------------------------------|---------------------------------|---------------------------------|---------|---------|
| MISO: $x$ Mn                                                                 | $\tau_1$ (× 10 <sup>6</sup> ns) | $\tau_2$ (× 10 <sup>6</sup> ns) | $A_1$   | $A_2$   |
| $x = 0.006$                                                                  | 0.8(1)                          | 3.46(8)                         | 79.(1)  | 850.(7) |
| $x = 0.012$                                                                  | 0.97(5)                         | 3.17(9)                         | 19(7)   | 74(2)   |
| $x = 0.016$                                                                  | 0.26(7)                         | 2.81(2)                         | 148.(8) | 793.(3) |
| $x = 0.020$                                                                  | 0.58(4)                         | 2.79(6)                         | 221.(8) | 743.(2) |
| $x = 0.024$                                                                  | 0.52(9)                         | 2.63(9)                         | 229.(7) | 673.(1) |

**Table S6.** Fitted values of  $A$ ,  $B$ , and  $\Delta E$  for the FIR–T curves of MGSO: $x$ Mn ( $x = 0.01$  and  $0.02$ ) and MGA<sub>0.2</sub>SO:0.01Mn.

|                                                                   | $A$       | $B$     | $\Delta E$ |
|-------------------------------------------------------------------|-----------|---------|------------|
| MGSO:0.01Mn<br>( $\lambda_{\text{ex}} = 280$ nm)                  | 0.21(2)   | 42.3(1) | 0.153(8)   |
| MGSO:0.02Mn<br>( $\lambda_{\text{ex}} = 280$ nm)                  | -0.017(8) | 6.2(8)  | 0.09(2)    |
| MGA <sub>0.2</sub> SO:0.01Mn<br>( $\lambda_{\text{ex}} = 280$ nm) | 0.03(1)   | 6.5(6)  | 0.13(1)    |
| MGSO:0.02Mn<br>( $\lambda_{\text{ex}} = 250$ nm)                  | 0.123(8)  | 3.24(9) | 0.07(2)    |
| MGA <sub>0.2</sub> SO:0.01Mn<br>( $\lambda_{\text{ex}} = 250$ nm) | 0.302(6)  | 5.50(8) | 0.07(2)    |

**Table S7.** Rietveld refinement parameters, agreement factors, and calculated Debye temperatures for MGA <sub>$y$</sub> SO:0.01Mn ( $y = 0, 0.6, 1.0$ ).

| $y$ | $a$ (Å)   | $b$ (Å)   | $c$ (Å)   | $V$ (Å <sup>3</sup> ) | $R_{\text{wp}}$ (%) | $R_{\text{p}}$ (%) | $\chi^2$ | $\Theta_{\text{D}}$ (K) <sup>a</sup> |
|-----|-----------|-----------|-----------|-----------------------|---------------------|--------------------|----------|--------------------------------------|
| 0   | 5.9967(5) | 17.986(8) | 8.4442(9) | 910.8(2)              | 9.43                | 6.75               | 4.44     | 739.6(9)                             |
| 0.6 | 5.9681(3) | 17.903(6) | 8.4011(2) | 897.6(7)              | 9.63                | 6.99               | 4.23     | 915.5(6)                             |
| 1   | 5.9618(3) | 17.870(9) | 8.3839(4) | 893.2(5)              | 8.11                | 6.39               | 3.53     | 1688.5(2)                            |

<sup>a</sup> Debye temperature ( $\Theta_{\text{D}}$ ) is calculated according to the expression  $\Theta_{\text{D}} = \sqrt{\frac{3\hbar^2 T N_A}{A_i K_B U_{\text{iso},i}}}$ , where  $U_{\text{iso}}$  indicates the atomic average displacement factor, and  $A_i$  is the atomic weight of the atom.
